# Supplementary material for: Normal-Fat vs. High-Fat Diets and Olive Oil vs. CLA-Rich Dairy Fat: A Comparative Study of Their Effects on Atherosclerosis in Male Golden Syrian Hamsters
Source: MDPI journal article supplement (doi:10.3390/metabo13070827), 2023-07-06
Supplement: s1 [file s1]

**SUPPLEMENTARY TABLE S1.** Fatty acids (FA) composition means (mol%) of olive oil (OO) and milk fat (MF), used for preparation of diets for hamsters.

| FA                   | Fat      |         |          |                |
|----------------------|----------|---------|----------|----------------|
|                      | OO       | MF      | SEM      | P <sup>1</sup> |
| <b>MCSFA</b>         |          |         |          |                |
| 10:0                 | 0.00340  | 11.25   | 3.248    | 0.000          |
| 12:0                 | 0.00512  | 5.349   | 1.543    | 0.000          |
| 14:0                 | 0.0124   | 12.80   | 3.693    | 0.000          |
| 15:0                 | 0.00345  | 1.194   | 0.3436   | 0.000          |
| Sum                  | 0.0243   | 30.60   | 8.827    | 0.000          |
| <b>LCSFA</b>         |          |         |          |                |
| 16:0                 | 12.50    | 26.59   | 4.056    | 0.000          |
| 17:0                 | 0.0172   | 0.6699  | 0.1884   | 0.000          |
| 18:0                 | 3.210    | 11.53   | 2.403    | 0.000          |
| 20:0                 | 0.151    | 0.2679  | 0.03599  | 0.063          |
| 21:0                 | 0.00382  | 0.0709  | 0.01936  | 0.000          |
| 22:0                 | 0.0350   | 0.1015  | 0.01942  | 0.011          |
| 24:0                 | 0.0141   | 0.0497  | 0.01034  | 0.006          |
| 26:0                 | 0.0195   | 0.0007  | 0.00552  | 0.012          |
| Sum                  | 15.95    | 39.29   | 6.725    | 0.000          |
| <b>BCFA</b>          |          |         |          |                |
| <i>iso</i> 14:0      | 0.000547 | 0.2293  | 0.006603 | 0.000          |
| <i>iso</i> 15:0      | 0.00112  | 0.4252  | 0.1224   | 0.000          |
| <i>anteiso</i> 15:0  | nd       | 0.7411  | 0.2139   | 0.000          |
| <i>iso</i> 16:0      | 0.00350  | 0.3781  | 0.1081   | 0.000          |
| <i>iso</i> 17:0      | nd       | 0.4426  | 0.2556   | 0.000          |
| <i>anteiso</i> 17:0  | 0.07740  | 0.4755  | 0.2300   | 0.000          |
| Sum                  | 0.08262  | 2.692   | 0.7532   | 0.000          |
| <b>c-MUFA</b>        |          |         |          |                |
| <i>cis</i> 9-14:1    | nd       | 0.2111  | 0.06163  | 0.011          |
| <i>cis</i> 9-16:1    | 0.802    | 0.7850  | 0.01778  | 0.725          |
| <i>cis</i> 10-17:1   | 0.0681   | 0.2284  | 0.04630  | 0.001          |
| <i>cis</i> 6-18:1    | nd       | 0.0905  | 0.02613  | 0.000          |
| <i>cis</i> 9-18:1    | 73.9     | 18.70   | 15.94    | 0.000          |
| <i>cis</i> 11-18:1   | 2.02     | 0.3748  | 0.4758   | 0.001          |
| <i>cis</i> 11-20:1   | 0.0711   | 0.0343  | 0.01200  | 0.113          |
| <i>cis</i> 13-22:1   | 0.00291  | 0.0002  | 0.00080  | 0.018          |
| Sum                  | 76.9     | 20.43   | 16.29    | 0.000          |
| <b>t-MUFA</b>        |          |         |          |                |
| <i>trans</i> 10-15:1 | nd       | nd      |          |                |
| <i>trans</i> 9-16:1  | nd       | 0.01631 | 0.0471   | 0.000          |
| <i>trans</i> 9-18:1  | 0.0109   | 0.2834  | 0.07869  | 0.000          |
| <i>trans</i> 11-18:1 | 0.00136  | 2.2312  | 0.6437   | 0.000          |
| Sum                  | 0.0122   | 2.531   | 0.7271   | 0.000          |
| <b>PUFA</b>          |          |         |          |                |
| 18:2n-6              | 6.067    | 1.878   | 1.210    | 0.001          |
| 18:3n-6              | 0.00189  | 0.07308 | 0.02059  | 0.002          |
| 18:3n-3              | 0.642    | 1.133   | 0.1426   | 0.001          |
| 20:4 n-6             | 0.292    | 0.07201 | 0.06664  | 0.047          |
| 20:5 n-3             | nd       | 0.1051  | 0.03051  |                |
| 22:6 n-3             | nd       | nd      |          |                |
| Sum PUFAn-6          | 6.360    | 2.023   | 1.254    | 0.001          |
| Sum PUFAn-3          | 0.642    | 1.238   | 0.1730   | 0.005          |
| Sum PUFA             | 7.00     | 3.264   | 1.081    | 0.001          |
| n-6/n-3              | 9.923    | 1.636   | 2.396    | 0.001          |
| <b>CLA</b>           |          |         |          |                |
| <i>c9,t11</i> -CLA   | 0.00228  | 1.174   | 0.3383   | 0.000          |
| <i>t10,c12</i> -CLA  | 0.00157  | nd      | 0.00079  | 0.465          |
| <i>c9,c11</i> -CLA   | 0.00298  | 0.00215 | 0.00124  | 0.927          |
| <i>t9,t11</i> -CLA   | 0.00210  | 0.00540 | 0.00098  | 0.011          |
| Sum                  | 0.00894  | 1.182   | 0.3386   | 0.000          |

BCFA: methyl-branched chain FA. CLA: conjugated linoleic acid. c-MUFA: *cis*-monounsaturated FA; LCSFA: long chain saturated FA; MCSFA: medium chain saturated FA; nd: not detected; SFA: saturated FA. SCD-1: Stearoyl-CoA-1 desaturase. t-MUFA: *trans*-monounsaturated FA.

**SUPPLEMENTARY TABLE S2.** Sequences of primers used in hepatic gene expression analysis

| Gene            | Exons             | Primer Sequences | mT (° C) | Lenght, pb | Accession No | Ref.                       |
|-----------------|-------------------|------------------|----------|------------|--------------|----------------------------|
| <b>β-actin</b>  | Exon 4            | Forward (3'→ 5') | 60       | 81         | NW_004801699 |                            |
|                 | Exon 4-5          | Reverse (5'→3')  |          |            |              |                            |
| <b>PPAR-α</b>   | Exon 6            | Forward (3'→ 5') | 55       | 180        | NW_004801613 | Vaille et al. <sup>1</sup> |
|                 | Exon 6 - Exon 7   | Reverse (5'→3')  |          |            |              |                            |
| <b>SR-B1</b>    | Exon 6 - Exon 7   | Forward (3'→ 5') | 55       | 129        | NW_004801705 |                            |
|                 | Exon 7            | Reverse (5'→3')  |          |            |              |                            |
| <b>ACAT</b>     | Exon 10 - Exon 11 | Forward (3'→ 5') | 55       | 101        | NW_004801613 |                            |
|                 | Exon 11           | Reverse (5'→3')  |          |            |              |                            |
| <b>MTP</b>      | Exon 12           | Forward (3'→ 5') | 60       | 101        | NW_004801723 | Lecker et al. <sup>2</sup> |
|                 | Exon 13           | Reverse (5'→3')  |          |            |              |                            |
| <b>HMG-CoAR</b> | Exon 14           | Forward (3'→ 5') | 55       | 81         | NW_004801607 | Huang et al. <sup>3</sup>  |
|                 | Exon 15           | Reverse (5'→3')  |          |            |              |                            |
| <b>CD36</b>     | Exon 9 - Exon 10  | Forward (3'→ 5') | 55       | 96         | NW_004801709 |                            |
|                 | Exon 10 - Exon 11 | Reverse (5'→3')  |          |            |              |                            |
| <b>LXR</b>      | Exon 3            | Forward (3'→ 5') | 60       | 181        | NW_004801605 |                            |
|                 | Exon 4            | Reverse (5'→3')  |          |            |              |                            |
| <b>ApoB 100</b> | Exon 25           | Forward (3'→ 5') | 65       | 278        | NW_004801692 |                            |
|                 | Exon 26           | Reverse (5'→3')  |          |            |              |                            |
| <b>LDLR</b>     | Exon 10-11        | Forward (3'→ 5') | 55       | 115        | NW_004801687 |                            |
|                 | Exon 11           | Reverse (5'→3')  |          |            |              |                            |
| <b>ApoA 1</b>   | Exon 2            | Forward (3'→ 5') | 62       | 182        | NW_004801622 |                            |
|                 | Exon 3 - 4        | Reverse (5'→3')  |          |            |              |                            |

ACAT: acyl-CoA: cholesterol acyltransferase; CD36: cluster of differentiation 36; HMG-CoAR: hydroxymethylglutaryl-CoA reductase; LDLR: LDL-receptor; LXR: liver X receptor MTP: microsomal triglyceride transfer protein; PPAR-α: peroxisome proliferator-activated receptor α, SR-B1: HDL scavenger receptor BI.

- <sup>1</sup>. [49] Vaille, K.; Férézou, J.; Amsler, G.; Quignard-Boulangé, A.; Parquet, M.; Grippo, D.; Dorovska-Taran, V.; Martin, J.C. A *cis-9,trans-11*-conjugated linoleic acid-rich oil reduces the outcome of atherogenic process in hyperlipidemic hamster. *Am J Physiol Heart Circ Physiol* **2005**, 289, H652-H659, DOI <https://doi.org/10.1152/ajpheart.00130.2005>.
- <sup>2</sup>. [60] Lecker, J.L.; Matthan, N.R.; Billheimer, J.T.; Rader, D.J.; Lichtenstein, A.H. Impact of dietary fat type within the context of altered cholesterol homeostasis on cholesterol and lipoprotein metabolism in the F1B hamster. *Metab Clin Exp* **2010**, 59, 1491-1501, DOI <https://doi.org/10.1016/j.metabol.2010.01.014>.
- <sup>3</sup>. [61] Huang, H.; Xie, Z.; Yokoyama, W.; Yu, L.; Wang, T.T.Y. Identification of liver CYP51 as a gene responsive to circulating cholesterol in a hamster model. *J Nutr Sci* **2016**, 5,e16. DOI 10.1017/jns.2016.

**SUPPLEMENTARY TABLE S3.** Fatty acids (FA) concentration (μmol/L) means (SD) in hamsters plasma.

| FA                           | Hamster groups                |                               |                              |                               |                |
|------------------------------|-------------------------------|-------------------------------|------------------------------|-------------------------------|----------------|
|                              | OO7 <sup>1</sup>              | OO21 <sup>2</sup>             | MF7 <sup>3</sup>             | MF21 <sup>4</sup>             | P <sup>5</sup> |
| <b>MCSFA</b>                 |                               |                               |                              |                               |                |
| 10:0                         | 26.16 (1.712)                 | 26.06 (1.706)                 | 24.56 (1.772)                | 30.44 (1.993)                 | 0.108          |
| 12:0                         | 10.49 (0.8158) <sup>a</sup>   | 13.48 (1.048) <sup>a</sup>    | 15.45 (1.350) <sup>a</sup>   | 46.22 (3.595) <sup>b</sup>    | 0.000          |
| 14:0                         | 25.07 (7.644) <sup>a</sup>    | 31.75 (9.681) <sup>a</sup>    | 37.16 (19.92) <sup>a</sup>   | 218.1 (33.24) <sup>b</sup>    | 0.002          |
| 15:0                         | 7.428 (0.6782) <sup>a,b</sup> | 6.370 (0.5816) <sup>a,b</sup> | 5.320 (0.558) <sup>b</sup>   | 12.36 (1.129) <sup>c</sup>    | 0.003          |
| Sum                          | 69.14 (10.85) <sup>a</sup>    | 77.65 (13.02) <sup>a</sup>    | 82.49 (23.60) <sup>a</sup>   | 307.2 (39.96) <sup>b</sup>    | 0.002          |
| <b>LCSFA</b>                 |                               |                               |                              |                               |                |
| 16:0                         | 1634 (107.1) <sup>a,b</sup>   | 2032 (283.4) <sup>b</sup>     | 1204 (251.1) <sup>a</sup>    | 3480 (167.2) <sup>c</sup>     | 0.002          |
| 17:0                         | 32.12 (5.460) <sup>a</sup>    | 35.15 (5.975) <sup>a</sup>    | 25.74 (5.760) <sup>a</sup>   | 74.14 (12.60) <sup>b</sup>    | 0.012          |
| 18:0                         | 631.4 (103.4) <sup>a</sup>    | 997.9 (131.2) <sup>b</sup>    | 371.5 (64.84) <sup>a</sup>   | 1010.7 (72.62) <sup>b</sup>   | 0.007          |
| 20:0                         | 3.423 (0.4626) <sup>a</sup>   | 5.651 (0.7638) <sup>a</sup>   | 3.651 (0.610) <sup>a</sup>   | 9.691 (1.310) <sup>b</sup>    | 0.005          |
| 21:0                         | 2.384 (0.4493)                | 2.644 (0.4981)                | 1.287 (0.3307)               | 2.770 (0.5219)                | 0.094          |
| 22:0                         | 38.53 (11.62) <sup>a,b</sup>  | 63.52 (19.15) <sup>b</sup>    | 10.06 (5.290) <sup>a</sup>   | 37.18 (11.21) <sup>a,b</sup>  | 0.061          |
| 24:0                         | 1.027 (0.5416)                | 1.254 (0.6613)                | 0.590 (0.297)                | 2.035 (1.073)                 | 0.346          |
| 26:0                         | 4.094 (0.5860) <sup>a</sup>   | 6.385 (0.9140) <sup>a</sup>   | 9.039 (1.622) <sup>a</sup>   | 57.07 (8.169) <sup>b</sup>    | 0.001          |
| Sum                          | 2347 (229.6) <sup>a,b</sup>   | 3145 (442.6) <sup>b</sup>     | 1626 (329.8) <sup>a</sup>    | 4674 (274.7) <sup>b</sup>     | 0.003          |
| <b>BCFA</b>                  |                               |                               |                              |                               |                |
| iso14:0                      | 1.047 (0.1607)                | 1.060 (0.1626)                | 0.9144 (0.1792)              | 1.147 (0.1760)                | 0.626          |
| anteiso14:0                  | 1.382 (0.4150)                | 1.738 (0.5220)                | 1.119 (0.5841)               | 2.060 (0.6185)                | 0.429          |
| iso15:0                      | 4.999 (1.503) <sup>b</sup>    | 2.161 (0.6497) <sup>a,b</sup> | 0.797 (0.417) <sup>a</sup>   | 2.446 (0.7354) <sup>a,b</sup> | 0.043          |
| anteiso15:0                  | 1.430 (0.4573)                | 3.176 (1.016)                 | 1.811 (1.057)                | 5.906 (1.889)                 | 0.066          |
| iso16:0                      | 5.267 (0.9478) <sup>a</sup>   | 5.755 (1.036) <sup>a</sup>    | 6.242 (1.507) <sup>a</sup>   | 18.21 (3.277) <sup>b</sup>    | 0.007          |
| anteiso16:0                  | 0.5306 (0.1555) <sup>a</sup>  | nd                            | nd                           | 0.4754 (0.1393) <sup>a</sup>  | 0.011          |
| iso17:0                      | 33.22 (8.726) <sup>a</sup>    | 21.87 (5.745) <sup>a</sup>    | 31.07 (12.98) <sup>a</sup>   | 145.6 (38.25) <sup>b</sup>    | 0.011          |
| anteiso17:0                  | 37.49 (8.155) <sup>a,b</sup>  | 69.26 (15.07) <sup>b</sup>    | 6.628 (2.083) <sup>a</sup>   | 35.05 (7.626) <sup>a,b</sup>  | 0.013          |
| Sum                          | 85.36 (20.52) <sup>a</sup>    | 105.0 (24.20) <sup>a,b</sup>  | 48.58 (18.81) <sup>a</sup>   | 210.9 (52.71) <sup>b</sup>    | 0.028          |
| <b>c-MUFA</b>                |                               |                               |                              |                               |                |
| cis9-14:1                    | 29.03 (5.745) <sup>a</sup>    | 37.71 (7.463) <sup>a</sup>    | 31.02 (8.525) <sup>a</sup>   | 109.1 (21.59) <sup>b</sup>    | 0.008          |
| cis9-16:1                    | 130.7 (26.27) <sup>a</sup>    | 84.20 (34.41) <sup>a</sup>    | 141.8 (30.13) <sup>a</sup>   | 365.6 (63.94) <sup>b</sup>    | 0.008          |
| cis10-17:1                   | 11.87 (1.426) <sup>a</sup>    | 6.592 (0.7915) <sup>a</sup>   | 20.99 (3.036) <sup>a</sup>   | 60.89 (7.311) <sup>b</sup>    | 0.001          |
| cis6-18:1                    | nd                            | nd                            | 5.886 (2.101) <sup>a</sup>   | 13.05 (3.096) <sup>b</sup>    | 0.006          |
| cis9-18:1                    | 2089 (152.4) <sup>a</sup>     | 3226 (313.6) <sup>b</sup>     | 1309 (105.7) <sup>a</sup>    | 3481.8 (506.5) <sup>b</sup>   | 0.007          |
| cis11-18:1                   | 180.9 (32.12)                 | 173.6 (30.83)                 | 94.25 (22.35)                | 173.5 (30.81)                 | 0.110          |
| cis11-20:1                   | 12.40 (3.706)                 | 21.22 (6.343)                 | 4.306 (2.229)                | 16.17 (4.832)                 | 0.078          |
| cis13-22:1                   | 3.661 (0.8913)                | 4.228 (1.028)                 | 2.078 (0.7703)               | 3.937 (0.9576)                | 0.231          |
| Sum                          | 2457 (222.6) <sup>a,b</sup>   | 3554 (394.5) <sup>b,c</sup>   | 1610 (174.82) <sup>a</sup>   | 4224 (639.1) <sup>c</sup>     | 0.010          |
| <b>t-MUFA</b>                |                               |                               |                              |                               |                |
| trans10-15:1                 | 0.9801 (0.1777) <sup>a</sup>  | nd                            | nd                           | 1.648 (0.2989) <sup>b</sup>   | 0.002          |
| trans9-16:1                  | 2.271 (0.5338) <sup>a</sup>   | 1.693 (0.3980) <sup>a</sup>   | 13.43 (4.730) <sup>b</sup>   | 2.664 (0.6263) <sup>a</sup>   | 0.021          |
| trans9-18:1                  | 6.571 (2.233)                 | 9.321 (3.168)                 | 3.732 (2.443)                | 19.08 (6.485)                 | 0.064          |
| trans11-18:1                 | 4.848 (1.185) <sup>a</sup>    | 4.797 (1.172) <sup>a</sup>    | 8.299 (3.100) <sup>a</sup>   | 42.60 (10.41) <sup>b</sup>    | 0.006          |
| Sum                          | 14.67 (4.130) <sup>a</sup>    | 15.81 (4.739) <sup>a</sup>    | 25.46 (10.27) <sup>a</sup>   | 65.99 (17.82) <sup>b</sup>    | 0.025          |
| <b>PUFA</b>                  |                               |                               |                              |                               |                |
| 18:2 n-6                     | 2249 (450.2) <sup>a</sup>     | 1933 (144.2) <sup>a</sup>     | 1738 (231.4) <sup>a</sup>    | 4162 (104.7) <sup>b</sup>     | 0.003          |
| 18:3 n-6                     | 81.19 (17.71) <sup>ab</sup>   | 107.0 (23.34) <sup>b</sup>    | 21.33 (6.730) <sup>a</sup>   | 48.71 (10.63) <sup>ab</sup>   | 0.021          |
| 18:3 n-3                     | 6.754 (1.801) <sup>a</sup>    | 10.90 (2.905) <sup>a</sup>    | 8.585 (3.674) <sup>a</sup>   | 69.68 (18.58) <sup>b</sup>    | 0.007          |
| 20:4 n-6                     | 1146 (168.6) <sup>a</sup>     | 1320 (194.1) <sup>ab</sup>    | 699.0 (129.7) <sup>a</sup>   | 1907 (217.0) <sup>b</sup>     | 0.012          |
| 20:5 n-3                     | 6.081 (0.7177) <sup>a</sup>   | 7.291 (0.8606) <sup>a</sup>   | 12.03 (1.704) <sup>a</sup>   | 81.99 (9.677) <sup>b</sup>    | 0.000          |
| 22:6 n-3                     | 229.0 (48.70) <sup>a</sup>    | 482.1 (42.42) <sup>b</sup>    | 150.6 (45.78) <sup>a</sup>   | 640.7 (76.14) <sup>b</sup>    | 0.003          |
| Sum n-6                      | 3477 (636.5) <sup>a</sup>     | 3361 (361.6) <sup>a</sup>     | 2459 (367.8) <sup>a</sup>    | 6118 (332.3) <sup>b</sup>     | 0.005          |
| Sum n-3                      | 241.9 (51.21) <sup>a</sup>    | 500.3 (46.18) <sup>b</sup>    | 171.2 (51.16) <sup>a</sup>   | 792.4 (104.4) <sup>c</sup>    | 0.003          |
| Sum PUFA                     | 3719 (687.8) <sup>a</sup>     | 3860 (407.8) <sup>a</sup>     | 2630 (419.0) <sup>a</sup>    | 6910 (436.7) <sup>b</sup>     | 0.004          |
| n-6/n-3                      | 14.42 (0.4219) <sup>b</sup>   | 6.713 (0.1031) <sup>a</sup>   | 14.70 (2.244) <sup>b</sup>   | 7.761 (0.6030) <sup>a</sup>   | 0.004          |
| <b>CLA</b>                   |                               |                               |                              |                               |                |
| cis9, trans11-CLA            | 4.525 (1.713) <sup>a</sup>    | 3.965 (1.501) <sup>a</sup>    | 19.80 (16.12) <sup>a</sup>   | 191.1 (72.311) <sup>b</sup>   | 0.018          |
| trans10, cis12-CLA           | 3.125 (0.7917)                | 3.095 (0.7841)                | 1.800 (0.7108)               | 3.004 (0.7612)                | 0.364          |
| cis9, cis11-CLA              | 7.272 (1.585) <sup>a</sup>    | 12.37 (2.695) <sup>a</sup>    | 7.392 (2.328) <sup>a</sup>   | 26.42 (5.757) <sup>b</sup>    | 0.015          |
| trans9, trans11-CLA          | 2.664 (0.8641) <sup>a</sup>   | 3.037 (0.9852) <sup>a</sup>   | 1.992 (1.194) <sup>a</sup>   | 14.48 (4.697) <sup>b</sup>    | 0.020          |
| Sum                          | 17.59 (4.953) <sup>a</sup>    | 22.47 (5.965) <sup>a</sup>    | 30.98 (20.35) <sup>a</sup>   | 235.0 (83.53) <sup>b</sup>    | 0.018          |
| <b>Total FA</b>              | 8711 (1180) <sup>a</sup>      | 10781 (1293) <sup>a</sup>     | 6059 (999.4) <sup>a</sup>    | 16627 (1544) <sup>b</sup>     | 0.005          |
| <b>SCD1 activity indices</b> |                               |                               |                              |                               |                |
| cis9-16:1/16:0               | 0.0796 (0.01086) <sup>b</sup> | 0.0406(0.01126) <sup>a</sup>  | 0.1177(0.00048) <sup>b</sup> | 0.1047(0.01334) <sup>b</sup>  | 0.006          |
| cis9-18:1/18:0               | 3.334 (0.3043)                | 3.241(0.1119)                 | 3.555(0.3060)                | 3.4360(0.2543)                | 0.396          |
| c9,t11CLA/t11C18:1           | 0.9175 (0.1290) <sup>a</sup>  | 0.8126(0.1142) <sup>a</sup>   | 2.174(1.130) <sup>a</sup>    | 4.409(0.6198) <sup>b</sup>    | 0.015          |

<sup>1</sup>Hamsters fed a diet containing 7% (w) of olive oil. <sup>2</sup>Hamsters fed a diet containing 21% (w) of olive oil. <sup>3</sup>Hamsters fed a diet containing 7% (w) of milk fat. <sup>4</sup>Hamsters fed a diet containing 21% (w) of milk fat. <sup>5</sup> P-value < 0.05 was considered statistical significance. <sup>a, b, c</sup> letters indicate significant differences in compared groups. BCFA: methyl-branched chain FA; CLA: conjugated linoleic acid; c-MUFA: cis-monounsaturated FA; LCSFA: long chain saturated FA; MCSFA: medium chain saturated FA; nd: not detected; SFA: saturated FA; SCD-1: Stearoyl-CoA-1 desaturase. t-MUFA: trans-monounsaturated FA.
